# Supplementary material
Source: PubMed Central journal article supplement (PMC6803307)
Supplement: AEM.01356-19-s0001.pdf [file AEM.01356-19-s0001.pdf]

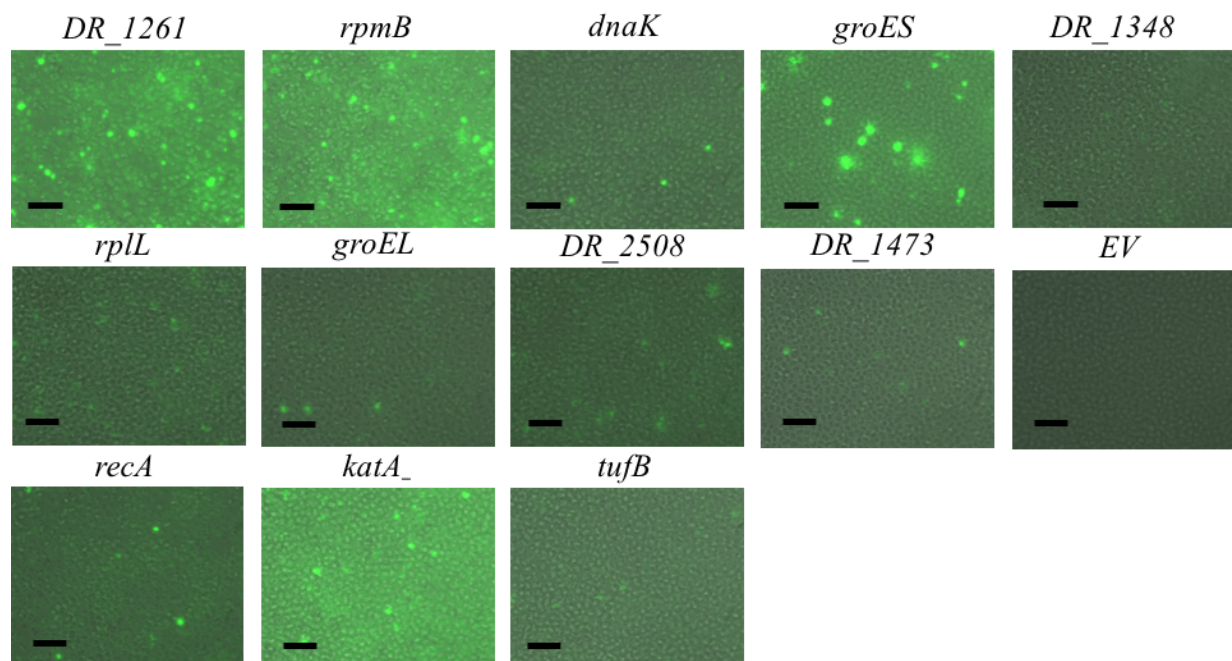

1  
2 **Figure S1.** Fluorescent microscopy images of promoter strains in stationary phase imaged at 630x show  
3 cell-to-cell heterogeneity in fluorescence that varies across promoter strains. Scale bar is 20  $\mu$ m.

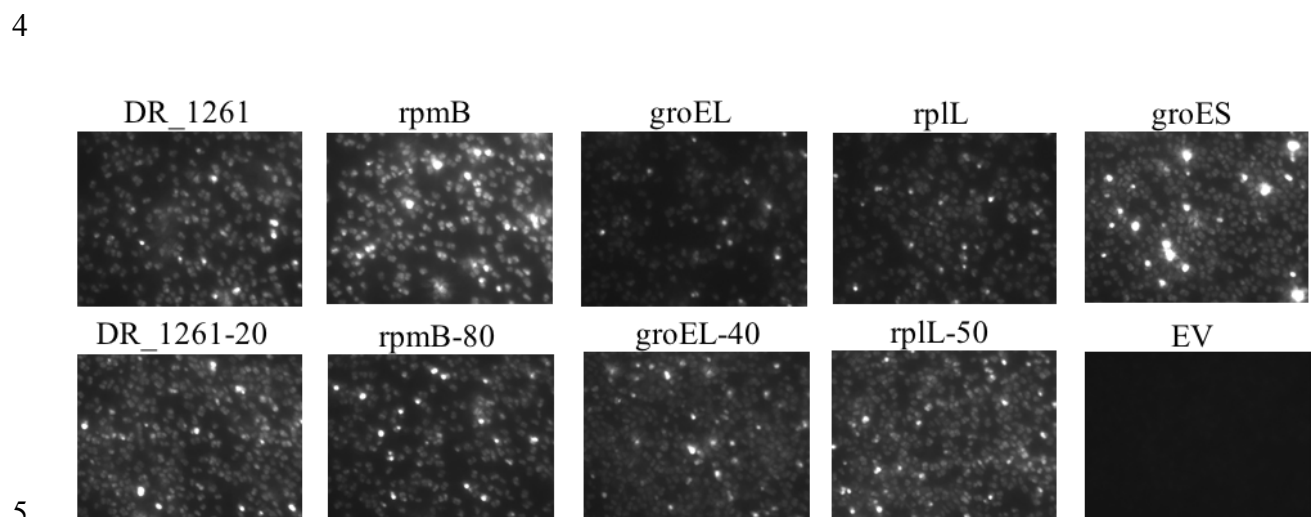

5  
6 **Figure S2.** Fluorescence imaging of full length and truncated promoters show conserved heterogeneity of  
7 expression across individual cells.

8  
9 **Table S1.** BPROM predicts -10 and -35 sites on several candidates. Intergenic regions for selected  
10 candidates and benchmarks were analyzed by BPROM to assess the computational identification of

11 promoter elements in *D. radiodurans*.

| Gene           | Length | Position | LDF  | -10 box position | seq-10    | -35 box position | Seq -35 |
|----------------|--------|----------|------|------------------|-----------|------------------|---------|
| <i>DR_2508</i> | 428    | 280      | 4.99 | 265              | ctctataat | 244              | ttgaca  |
| <i>RecA</i>    | 501    | 464      | 0.53 | 449              | ccgcaccct | 429              | ttgacc  |
| <i>rpmB</i>    | 257    | 106      | 1.17 | 91               | ggttaagat | 74               | ttcgg   |
| <i>tufB1</i>   | 136    | 98       | 1.98 | 83               | tgatatagt | 64               | acgcca  |
| <i>tufB2</i>   | 238    | 200      | 1.98 | 185              | tgatatagt | 166              | acgcca  |
| <i>dnaK</i>    | 141    | 85       | 4.05 | 70               | tcgtatgat | 50               | ttgact  |
| <i>groES</i>   | 228    | 150      | 2.82 | 135              | ctctaccat | 114              | ttgaca  |
| <i>DR_1473</i> | 332    | 130      | 0.22 | 115              | gattacgaa | 97               | ttgaac  |
| <i>DR_0325</i> | 186    | 160      | 0.78 | 146              | cggtatggt | 120              | ttgctg  |
| <i>uvrA</i>    | 202    | 113      | 3.77 | 98               | tgtagaat  | 81               | ttcagg  |
| <i>DR_0911</i> | 132    | 66       | 0.85 | 51               | cgccaacat | 26               | ctgtca  |
| <i>DR_1654</i> | 106    | 61       | 1.6  | 46               | ttgtattgt | 22               | ttcct   |
| <i>mutL</i>    | 425    | 127      | 2.79 | 112              | ttctcttat | 92               | gtcaaa  |
| <i>LexA</i>    | 211    | 133      | 2.3  | 118              | ccctattct | 94               | ttgtca  |
| <i>ClpB</i>    | 397    | 216      | 0.7  | 201              | cgcgagaat | 182              | ctgttt  |
| <i>DR_1910</i> | 243    | 84       | 3.46 | 69               | ttttttat  | 47               | ttgcca  |
| <i>rpmI</i>    | 178    | 62       | 2.27 | 43               | gtgtaaaat | 27               | ctgcca  |
| <i>DR0781</i>  | 161    | 97       | 0.99 | 82               | gtctacgat | 61               | gtccca  |

12

13 **Table S2.** Neural Network Promoter Predictor prediction of top eight promoters and benchmarks

14 identifies potential transcription start sites of *rpmB*, *DR\_2508*, and *dnaK*.

| Strain         | Start | End | Score | Promoter Sequence                                  |
|----------------|-------|-----|-------|----------------------------------------------------|
| <i>dnaK</i>    | 2     | 47  | 0.96  | ctttcttgatgttgccagcaaacctgagtctaatacactcaagtctatt  |
| <i>dnaK</i>    | 44    | 89  | 0.95  | agtctattgactctgggggattgtagtcgtatgatacttgcaagtcaaga |
| <i>DR_1654</i> | 44    | 89  | 0.98  | attgtattgtcctcacgttgttcaagcttcatcacttcagggtcagt    |
| <i>DR_2508</i> | 239   | 284 | 0.96  | tcacctgacagagctattatctcatctctataattcgcgccgggatctc  |
| <i>groES</i>   | 109   | 154 | 0.94  | gtcagttgacatTTTTcttatcggcgctctaccatccgtgacggattgaa |
| <i>kata</i>    | 93    | 138 | 0.84  | gggccctggacattgagaatgattctcaatatggtgcaggagcttcggg  |
| <i>LexA</i>    | 92    | 137 | 0.88  | agttgtcagtcaggacgacggtcagccctattctttccgttcaaactc   |
| <i>RecA</i>    | 453   | 498 | 0.96  | accctgtagaacactggttacgtcctccatataactccgggtgaggtgtt |
| <i>rpmB</i>    | 41    | 86  | 0.81  | ggagtggcgaaggetccgcgccccagggtctatctttcgggctcgcagta |

15

16

17 **Table S3.** bTSSfinder was used to find potential sigma sequences for identification of top candidate and  
18 benchmark promoters. Assessment with bTSSfinder results in prediction of several potential promoter  
19 sequences in *DR\_2508*, two in *DR\_1473* and one in *rpmB*.

| Promoter       | TSS | Score | sigma | box35 | box35    | box10 | box10 seq  |
|----------------|-----|-------|-------|-------|----------|-------|------------|
|                |     |       |       | pos   | seq      | pos   |            |
| <i>DR_2508</i> | 281 | 1.92  | 38    | 244   | ttgaca   | 268   | tataat     |
| <i>DR_2508</i> | 270 | 1.91  | 24    | 234   | aaaagt   | 259   | tctca      |
| <i>DR_2508</i> | 266 | 1.97  | 70    | 230   | gacaaa   | 254   | tattat     |
| <i>DR_2508</i> | 240 | 1.87  | 28    | 208   | agccgact | 227   | gacgacaa   |
| <i>DR_2508</i> | 201 | 1.92  | 32    | 166   | accaagt  | 188   | gacctcaaac |
| <i>RecA</i>    | 413 | 1.84  | 28    | 380   | tccgcgca | 399   | gccgaaag   |
| <i>RecA</i>    | 410 | 1.79  | 32    | 374   | ggctgct  | 396   | tccgccgaaa |
| <i>RecA</i>    | 228 | 1.73  | 24    | 193   | acacct   | 218   | getca      |

|                |     |      |    |     |          |     |            |
|----------------|-----|------|----|-----|----------|-----|------------|
| <i>rpmB</i>    | 201 | 1.68 | 28 | 165 | agcagcac | 184 | cccggaga   |
| <i>DR_1473</i> | 247 | 1.16 | 32 | 213 | agatgcg  | 233 | gcccgcgtct |
| <i>DR_1473</i> | 204 | 1.75 | 24 | 172 | caaaga   | 193 | gcgaa      |
| <i>mutL</i>    | 361 | 1.83 | 32 | 327 | ggctaaa  | 347 | gccccacgt  |
| <i>mutL</i>    | 229 | 1.78 | 38 | 189 | ctcgcg   | 216 | cagact     |
| <i>mutL</i>    | 214 | 1.95 | 24 | 181 | gcacgg   | 203 | actca      |
| <i>mutL</i>    | 208 | 1.95 | 28 | 176 | aaagcgca | 195 | tccgtaga   |
| <i>ClpB</i>    | 318 | 0.54 | 24 | 285 | aatca    | 307 | tctct      |
| <i>ClpB</i>    | 217 | 1.82 | 70 | 182 | ctgttt   | 204 | gagaat     |
| <i>ClpB</i>    | 207 | 1.74 | 32 | 171 | catttga  | 193 | gtcaccagcg |

---

20

21
